# Supplementary material
Source: Research Square preprint supplement (doi:10.21203/rs.3.rs-8348945/v1)
Supplement: Supplementary file 1 [file 00a93e1162733fc9793f98ae.docx]

**Supplementary Material: Farmers’ actions towards sustainability: An evidence-based methodology for native forest ecosystems supporting low-carbon livestock in grazed dairy systems**

**Efraín Duarte 1, 2, 3, *, Viviana Bustos 3, 8** ***, Elisavet Zoupanidou 4, Patricio Barria 5, Claudia Garrido-Ruiz 3, 6,Alexander Hernandez 1, Jose I. Orellana 7, and Benjamín Glasner 3, 8**

1 Agricultural Research Service (ARS) Forage and Range Research Laboratory (FRR), United States Department of Agriculture (USDA), Logan, UT 84322, USA.

2 SCINet Program and ARS AI Center of Excellence, Office of National Programs, USDA Agricultural Research Service, Beltsville, MD 20705, USA.

3 Departamento de Acuicultura y Recursos Agroalimentarios, Universidad de Los Lagos, Avda. Fuchslocher 1305, Osorno 5290000, Los Lagos, Chile.

4 GEDT Institute/Hub, Université de Genève. 66 boulevard Carl-Vogt, 1205 Geneva, Switzerland.

5 Consultora Sociedad Forestal Bosques de Paimún Ltda, Chacabuco 308, Of. 223, Valdivia, Chile.

6 Department of Plants, Soils and Climate, Utah State University, Logan, UT 84322, USA.

7 Instituto de Biología, Facultad de Ciencias, Pontificia Universidad Católica de Valparaíso, Valparaíso, Chile.

8 Programa de Investigación Cero Huella, Vicerrectoría de Investigación y Post Grado, Universidad de Los Lagos, Avda. Fuchslocher 1305, Osorno 5290000, Los Lagos, Chile .

* Corresponding author: Viviana Bustos, Laboratorio de Carbono y Cambio Climático, Departamento de Acuicultura y Recursos Agroalimentarios, Universidad de Los Lagos, Av. Fuchslocher 1305, Casilla 933, Osorno, Chile. Tel.: +56 93393 4828, E-mail: viviana.bustos@ulagos.cl, ORCID: 0000-0002-4347-1107

* Corresponding author: Efrain Duarte, Agricultural Research Service (ARS) Forage and Range Research Laboratory (FRR), United States Department of Agriculture (USDA), Logan, UT 84322, USA. Tel.: +1 435 554-6839, E-mail: efrain.duarte@usda.gov, ORCID: 0000-0003-3977-1024.

**Table S1. Overview of the six dairy farm study sites, including general characteristics, soil and physical features, chemical properties, climatic conditions, and dominant forest types.**

| **Description** | **Study sites** | | | | | |
| --- | --- | --- | --- | --- | --- | --- |
| **Site 1** | **Site 2** | **Site 3** | **Site 4** | **Site 5** | **Site 6** |
| **General features** |  |  |  |  |  |  |
| Region | Los Ríos | Los Ríos | Los Ríos | Los Lagos | Los Lagos | Los Lagos |
| Farm Name  Province | Pitriuco  Ranco | CDM  Valdivia | CDL  La Unión | Las Vertientes  Osorno | La Querencia  Osorno | Amancayes  Llanquihue |
| Type of Dairy Farming | Year Round | Year Round | Year Round | Seasonal | Year Round | Year Round |
| System | Pasture- based | Mixed | Stalls** | Pasture- based | Pasture- based | Pasture- based |
| Commune | Lago Ranco | Máfil | La Unión | Puyehue | Puyehue | Fresia |
| Latitude and Longitude (GCS-WGS84) | -72.62, -40.25 | -72.84, -39.71 | -72.83, -40.18 | -72.81, -40.67 | -72.59, -40.72 | -73.43, -41.25 |
| **Soil features** |  |  |  |  |  |  |
| Soil Type | Trumao – Red Clay | Trumao | Trumao – Red Clay | Trumao | Trumao | Red Clay |
| Slope (%) | 3% | 0% | 0% | 2% | 2% | 2% |
| Soil Texture | Clayey | Clayey | Clayey | Clayey | Clayey | XX |
| Soil Order | Andisol | Andisol | Andisol | Andisol | Andisol | Ultisol |
| **Physical Features** |  |  |  |  |  |  |
| Organic matter | Medium | High | High | High | High | Medium |
| Drainage | Imperfect | Imperfect | Imperfect | Free | Free | Imperfect |
| Erosion risk | Medium | Low | Medium | High | High | Medium |
| **Chemical Features** |  |  |  |  |  |  |
| Acidity | Moderate | Moderate | Moderate | High | High | Moderate |
| Phosphorus | Low | Low | Low | Low | Low | Very Low |
| Sulphur | Low | Low | Low | Low | Low | Very Low |
| Potassium | Moderate | Moderate | Moderate | Low | Low | Low |
| **Climate features** |  |  |  |  |  |  |
| Winter mean Tº (oC) | 6.9 | 7.1 | 7.7 | 5.7 | 5.7 | 7.5 |
| Summer mean Tº (oC) | 11.7 | 15.5 | 15.9 | 14.9 | 14.9 | 12.9 |
| Mean precipitation (mm) | 1,544 | 1,571 | 1,040 | 1,420 | 1,420 | 2,307 |
| **Forest type*** | RO-RA-CO and Evergreen | RO-RA-CO and Evergreen | Evergreen | Evergreen | RO-RA-CO | RO-RA-CO |

*RORACO: Roble, Raulí Coigüe (Donoso et al., 1993; Santibáñez et al., 2016)

**Table S2:** Tree volume functions and basic wood density values used for the calculation of biomass per species (Data compiled by Drake et al., 2003).

| **Common Name (Abbreviation)** | **Volume Functions** | **Basic Density**  **(kg/m3)** |
| --- | --- | --- |
| Arrayan (LA) |  | 799.1 |
| Avellano (GA) |  | 506.7 |
| Canelo (DW) |  | 431.2 |
| Coigüe (ND) |  | 504.2 |
| Espino Negro (RE) |  | 830* |
| Laurel (LP) | False form factor | 447.2 |
| Lingue (PL |  | 464.3 |
| Luma (AL) |  | 764.5 |
| Maiten (MB) | False form factor | 474.4 |
| Maqui (AC) |  | 331.0 |
| Meli (AM) |  | 799.1 |
| EC (Notro) | False form factor | 474.4 |
| Olivillo (AP) |  | 487.9 |
| Palmilla (LF) | False form factor | ** |
| Patagua (CP) | False form factor | ** |
| Picha (MP) | False form factor | 799.1 |
| Radal (LH) |  | 474.4 |
| Roble (NO) |  | 461.4 |
| Tepu o Temo (BC) | False form factor | 799.1 |
| Tiaca (CP) | False form factor | 555.0 |
| Ulmo (EC) |  | 546.9 |

**Table S3. Mean annual periodic increment (m³ ha⁻¹ year⁻¹) for the main native forest types of southern Chile, based on National Forest Inventory data**

| **Forest type** | **Mean annual periodic increment (m3 ha-1 year-1)*** |
| --- | --- |
| Alerce (*Fitzroya cupressoides*) | 0.5 |
| Ciprés de Las Guaitecas (*Pilgerodendron uviferum*) | 3.9 |
| Ciprés de La Cordillera (*Austrocedrus chilensis*) | 5.0 |
| Lenga (*Nothofagus pumilio*) | 5.8 |
| Roble Hualo (*Nothofagus obliqua and/or Nothofagus glauca*) | 5.1 |
| Roble (*Nothofagus obliqua*) – Raulí (*Nothofagus alpina*) Coihue (*Nothofagus dombeyi*) | 6.6 |
| Coihue – Raulí – Tepa (*Laureliopsis philippiana*) | 5.8 |
| Esclerófilo | 1.5 |
| Siempreverde (Evergreen) | 6.0 |

***Source:** (INFOR, 2015).

**Table S4:** Summary of Sentinel 2 spectral bands and indices covariates used to model aboveground biomass (AGB) in this study.

| **Dataset (Covariates)** | **Abbr** | **Formula** | **Bands** | **Reference** |
| --- | --- | --- | --- | --- |
| Normalized Difference Vegetation Index | NDVI |  | B8, B4 | (Illarionova et al., 2024) |
| Enhanced Vegetation Index | EVI |  | B8A, B4, B2 | (A. Huete et al., 2002) |
| Soil Adjusted Vegetation Index | SAVI |  | B8, B4 | (A. R. Huete, 1988) |
| Index-Based built-up Index | IBI |  | B11, B3, B8, B4 | (Xu, 2008) |
| Bare Soil Index | BSI |  | B11, B4, B8, B2, | (Hill, 2013) |
| Green Normalized Difference Vegetation Index | GNDVI |  | B8A, B3 | (Gitelson et al., 1996) |
| Band 2 Blue | BBLUE | Wavelength (nm) 490 - Bandwidth (nm) 65 | B2 | (Drusch et al., 2012) |
| Band 3 Green | BGREEN | Wavelength (nm) 560 - Bandwidth (nm) 35 | B3 |
| Band 4 Red | BRED | Wavelength (nm) 665 - Bandwidth (nm) 30 | B4 |
| Band 5 | Red Edge1 | Wavelength (nm) 705 - Bandwidth (nm) 15 | B5 |
| Band 6 | Red Edge2 | Wavelength (nm) 740 - Bandwidth (nm) 15 | B6 |
| Band 7 | Red Edge3 | Wavelength (nm) 783 - Bandwidth (nm) 20 | B7 |
| Band 8 | NIRwide | Wavelength (nm) 842 - Bandwidth (nm) 115 | B8 |
| Band 8A | NIRnarrow | Wavelength (nm) 865 - Bandwidth (nm) 20 | B8A |
| Band 11 Shortwave infrared- | SWIR | Wavelength (nm) 1,610 - Bandwidth (nm) 90 | B11 |
| Band 12 Shortwave infrared- | SWIR | Wavelength (nm) 2,190 - Bandwidth (nm) 180 | B12 |

**Table S5:** Main native species found in the carbon inventories of the six dairy farms of Los Ríos and Los Lagos Regions.

| **Common Name** | **Scientific name** | **Abb** | **IUCN Red List Categories*** |
| --- | --- | --- | --- |
| Arrayán | *Luma apiculata* | LA | LC |
| Avellano | *Gevuina avellana* | GA | LC |
| Canelo | *Drimys winteri* | DW | LC |
| Coigüe | *Nothofagus dombeyi* | ND | LC |
| Espino Negro | *Rhaphithamnus ~~e~~spinosus* | RE | LC |
| Laurel | *Laurelia sempervirens* | LS | NT |
| Lingue | *Persea lingue* | PL | LC |
| Luma | *Amomyrtus luma* | AL | NE |
| Maitén | Maytenus boaria | MB | LC |
| Maqui | *Aristotelia chilensis* | AC | NE |
| Meli | *Amomyrtus meli* | AM | LC |
| Notro | *Embothrium coccineum* | EC | LC |
| Olivillo | *Aextoxicon punctatum* | AP | LC |
| Palmilla | *Lomatia ferruginea* | LF | NE |
| Patagua | *Crinodendron patagua* | CP | NE |
| Picha o Pitra | *Myrceugenia planipes* | MP | NE |
| Radal | *Lomatia hirsuta* | LH | LC |
| Roble | *Nothofagus obliqua* | NO | LC |
| Temu o Temo | *Blepharocalyx cruckshanksii* | BC | NT |
| Tiaca | *Caldcluvia paniculata* | CP | NE |
| Ulmo | *Eucryphia cordifolia* | EC | NT |

* IUCN red list categories: Not Evaluated (NE), Data Deficient (DD), Least Concern (LC), Near Threatened (NT), Vulnerable (V), Endangered (E), Critically Endangered (CE), Extinct in the Wild (EW) and Extinct.
